# Supplementary material for: Psychological symptoms in relatives of critically ill patients (ICU families): a prospective multicenter study
Source: Springer Nature journal article supplement (doi:10.1007/s00134-020-05997-5), 2020-03-18
Supplement: MOESM1 [file 17811486]

**Additional information to: PSYCHOLOGICAL SYMPTOMS IN RELATIVES OF CRITICALLY ILL PATIENTS (ICU-FAMILIES): A PROSPECTIVE MULTI-CENTRE STUDY**

**Introduction**

The admission of patients to an intensive care unit (ICU) is mostly a stressful event for relatives. Uncertainty about whether the patient will survive and its impact on future life as well as the rather technological ICU environment may trigger insecurity and anxiety. A large number of relatives report stress, depressive feelings, sleep disturbances and anxiety [1-8]. A French study reported symptoms of post-traumatic stress disorder (PTSD) in 30% of relatives of critically ill patients. The prevalence increased to > 48% among relatives who felt that they had not received adequate information [9]. In 2012, Schmidt and Azoulay reported that around 70% of relatives are affected by anxiety and 35% experience depressive symptoms [10]. Rushinova et al. reported similar findings for anxiety (78%) and depression (54%) [11]. In 2014, Netzer coined the term “family intensive care unit syndrome” (FICUS) to describe these symptoms in relatives [12]. The wide variability of the results with respect to PTSD symptoms and other forms of emotional and psychological stress in relatives of critically ill patients is due to the different methods and time points used to quantify these parameters in many studies [13]. In addition, many patients die in the ICU, which obviously places a particularly intense psychological burden on their relatives [14,15].

An early study carried out by Pochard in 2005 showed that symptoms of anxiety and depression were very pronounced until the end of the patients’ stay in the ICU, irrespective of whether the patients were in a good state of health and able to be transferred to another ward or whether they were close to death [16]. The psychological burden on relatives persists not just while the patient is in the ICU; it can also lead to impairment of mental health and quality of life for a long time after the initial event and ICU stay. A study by Fumis et al. in 2015 reported, that relatives of critically ill patients actually suffered more from anxiety, depressive feelings and symptoms of PTSD than the patients themselves three months after the patients had left the ICU [17]. A study from the United States in 2008 found that, six months after patients had been discharged from the ICU, 35% of their relatives were still experiencing a high level of PTSD symptoms (Impact of Event Scale (IES) score >30) [18]. A multicentre observational study in 21 ICUs in France found that about three months after patients had been discharged from the ICU, their relatives had symptoms of mental and social impairment. [19]. Critically ill patients also suffer from severe impairment of their quality of life after the ICU stay. This includes impairments on a physical level such as neuromuscular weakness. On a neuropsychiatric level, patients experience cognitive impairments, depressive symptoms, PTSD symptoms, memory gaps, nightmares or delirium [20]. The term post-intensive care syndrome (PICS) is used to refer to these critically ill patients [21]. The admission to ICU and the patients’ condition affects the quality of life of their relatives, who are frequently unprepared to cope with the consequences of ICU survival in everyday life [18,19].

This study is the run-in phase of the ICU-Families trial (ClinicalTrials.gov Identifier: NCT02931851) which is a randomized controlled trial to examine the effect of online information. The aim of this present study was to examine the degree to which relatives of ICU-patients are affected by PTSD symptoms on ICU admission and 30 days later.

**Methods**

***Study design***

This is a multicentre prospective cohort study performed in three independent ICUs in Graz, Vienna (both Austria) and Bern (Switzerland). The study was approved by the Medical University of Graz ethics committee (approval no: 27-317 ex 14/15), the Ethics Committee in Vienna (approval no: 1910/2016) and the Swiss Ethics Committee in Bern (approval no: 2016-01168).

***Setting***

One interdisciplinary ICU (11 beds), one cardiological ICU (9 beds) and one gastroenterology and hepatology ICU (7 beds) in Austria and one interdisciplinary ICU in Switzerland with 37 ICU beds participated in this study. The data were collected in 2016 and 2017 by trained investigators at each study site.

***Study population***

The study population included relatives of critically ill patients. The relatives were selected in a pseudo-random approach by the investigators and invited to take part in the study. The inclusion criteria was a minimum age of ≥18 years. The expected duration of the patient’s stay in the ICU had to have been estimated as at least ≥72 hours (by the ICU physicians or ICU nurses treating them). Patients who were dying or who were thought to spend less than two days in the ICU were not included in the study. The relatives’ primary residence had to be in the same country as the study site. Exclusion criteria were: insufficient German language skills and an impaired reading ability or sight, or imminent death (when the patient was expected to die within five days (estimation by the independent treating ICU physician)). Since this study was planned as a pilot study ahead of the randomised controlled study (RCT), it was determined that a target number of ten relatives per study site taking part in the subsequent RCT should be recruited within a stipulated period. The number of relatives was guided by the number in similar studies [22] and by the size of the control group planned for the following RCT (ClinicalTrials.gov Identifier: NCT02931851) which was determined by a sample size calculation.

***Selection of participants and study procedure***

Relatives (family members and very close friends referred to as “loved ones”) were invited to take part in the study on the day the patient was admitted to the ICU and up to two days afterwards. The relatives provided written informed consent. The baseline measurement (T0) was between zero and two days after the patient had been admitted to the ICU and the second time (T30) was 30 days later. The baseline data were collected by trained interviewers using face to face interviews and T30 by telephone.

***Study Measurements***

Post-traumatic stress disorder symptoms were measured with the Impact of Event Scale (IES) [23,24,25]. The IES is used to record subjective stress after an extraordinary traumatic event. The tool consists of two scales. It measures both intrusion (which includes recalling and re-experiencing events and dreams) and avoidance (including attempts to avoid a danger) and has fifteen items. The present study was designed in line with the important study by Lautrette et al. published in 2007, therefore the original IES was used [22]. It should be noted that the IES is not intended to diagnose PTSD, only to describe the degree to which symptoms of PTSD occur. The IES is a screening tool for individuals who might benefit from more formal tests for PTSD [13]. The final diagnosis of PTSD should be done by specially trained psychiatrists. The scale should be completed by the affected individuals with reference to a stressful event. The items are assessed with reference to a specific period of time. Each item is assessed on a scale of 0 to 5 points for individual statements. Total scores between 0 and 8 are of no particular importance, scores between 9 and 26 indicate an event with an impact (individuals may be affected by symptoms of PTSD), scores between 27 and 43 indicate a strong impact (individuals are fairly certain to be affected by symptoms of PTSD) and scores between 44 and 75 indicate serious effects that compromise the individual’s ability to function. In the present study, scores higher than >27 were considered to be clinically relevant. Various cut-off scores that may differ according to setting and target group are given for the tool in the literature [13]. A score >35 and above is the cut-off point for a possible diagnosis of PTSD. The clinical relevance of the IES is supported by its use in many psychopharmacological studies and outcome studies, particularly in the ICU setting [13,18]. The scale has already been tested in other studies of the relatives of critically ill patients [18,26]. Further background information (age, sex, living situation) were recorded from the relatives.

***Data analysis***

Descriptive analysis was used to describe the sample characteristics for continuous (mean, standard deviation, median, minimum, maximum) and categorical (frequencies and relative frequencies) data. Continuous data is presented as mean ± standard deviation or otherwise as noted. IES-score comparisons between day 0 (T0) and day 30 (T30) were done using a paired t-test. Sex differences and differences between been relatives present or absent at the event that led to the patient’s admission to the ICU were explored by an independent t-test. A p-value of <0.05 (2-sided) is considered to indicate statistical significance. All analyses were performed using IBM SPSS Statistics, version 26.0 (IBM Corp).

**Results**

Forty-two relatives (12 men, 30 woman) were enrolled in this multicentre prospective study (Austria n=32, Switzerland n=10). The mean age of the relatives was 53 ± 15 years. Table 1 describes the characteristics of the study population. Figure 1 shows enrolment in the study and follow-up.

Table 1: Characteristics of the study participants

| Variables | **N** | **%** |
| --- | --- | --- |
| Age in years m, (SD), median (min-max) | 52.6 ± 15.5 | 53 (22-79) |
| Sex (n,%) | | | |
| Male | 12 | 28.6 |
| Female | 30 | 71.4 |
| Level of education (n,%) | | | |
| College/University | 9 | 21.4 |
| Apprenticeship /Final qualification  for university | 24 | 57.1 |
| Graduated secondary school | 6 | 14.3 |
| Other | 3 | 7.1 |
| Relationship to the patient (n, %) | | | |
| Husband/ Wife | 12 | 28.6 |
| Parents | 2 | 4.8 |
| Grandchild | 2 | 4.8 |
| Father/ Mother | 1 | 2.4 |
| Sister/Brother | 6 | 14.3 |
| Son/ Daughter | 13 | 31.0 |
| Others | 6 | 14,3 |
| Living together with children (n, %) | | | |
| Yes | 6 | 15.0 |
| No | 34 | 85.0 |
| Unknown | 2 |  |
| Present at the event (n, %) |  |  |
| Yes | 21 | 52.5 |
| No | 19 | 47.5 |
| Unknown | 2 |  |

Legend: m= Mean, SD= Standard Deviation, Min.= Minimum, Max.= Maximum

**Figure 1: Study screening, enrolment and follow up**

69 relatives were screened for inclusion criteria

21 relatives did not fulfil the inclusion criteria

5 relatives declined study participation

43 relatives were enrolled in the study and tested at time T0

1 relative was lost to telephone follow-up

42 relatives were tested at time T30

42 relatives were included in the evaluation

Legend: T0= between zero and two days after the patient had been admitted to ICU, T30= 30 days after the patient had been admitted to ICU

At baseline (T0), the mean IES score was 31.4 ± 13.7 points (median 32.0, min. 5.0, max. 59.0). Twenty-four of 42 relatives had a score over 27 points and 19 had a score over 35. At T30, the relatives had a mean IES score of 24.7 ± 10.6 points (median 23.0, min. 6.0, max. 51.0). Fifteen of 42 relatives still had a score over 27, and seven had a score over 35. The IES score was significantly higher at T0 than at T30 (31.4 13.7 vs. 24.7 10.6, p<0.001). Women had higher scores at T0 than men (33.6 ± 14.4 versus 25.8 ± 10.2, p=0.093). The scores for men and woman were comparable at T30 (25.0 ± 10.3 versus 24.0 ± 11.6, p=0.779).

**Discussion**

As part of the run-in phase of the ICU Families project, a multicentre prospective cohort study prospectively tested relatives of critically ill patients using the IES at two different time points. Our study shows a substantial emotional and psychological burden on relatives in regard to subjective stress, especially in those present at the event leading to ICU admission. Even 30 days later, the IES scores were still high although improved compared to baseline.

Our findings are consistent with other studies [1-8,13,17]. Alfheim et al. reported in 2018, that around 54% of family members suffer from severe symptoms of PTSD. The intensity of the mental burden declines during the following six months [27].

Lemiale et al. (2010) showed that many relatives are still suffering from mental and social deficits even three months after the patients have left the ICU [19]. In some cases, this burden led to relatives taking medication to relieve anxiety or depressive states [19]. Anderson et al. reported that around 35% were affected by relevant symptoms of PTSD (IES score >30) when interviewed six months after ICU discharge. [18]. These results show that the psychological burden on relatives persists not only during ICU treatment; it can also lead to impairment of mental health and quality of life for a long time after the original event. This may not only have a social but also a substantial economic impact [19]. The varying methods and measurement tools for PTSD employed, as described by Petrinec et al. (2016), could be a reason for the lack of consensus in the scientific community [13]. Agreement on a tool for the standardised recording of psychological symptoms offered routinely to relatives in the hospital setting could help to identify those who are severely affected. They could then be informed about sources of support available within and outside the hospital.

Women had higher scores than men at time T0, this can only be seen as a trend. The scores for women and men were similar at T30. Other studies have also shown a difference between the sexes in terms of psychological symptoms [17]. Belayachi et al. showed in 2014 that women have significantly higher scores for anxiety and depression [2].

Being present at the event that led to ICU admission, seems to have a major influence on the emotional and psychological burden on relatives. Particular attention could therefore be paid to respective relatives in subsequent studies as they appear more likely to require support. The guidelines for “Family-centred care in the neonatal, paediatric and adult ICU” mention a wide range of available support options [28]. Alfheim et al. (2019) also highlights special features of the stress experienced by relatives. Relatives with little hope, younger relatives and patients with more comorbidities and sickness-related absences are associated with more severe PTSD symptoms. Interestingly, being one of the patient’s parents was associated with less pronounced symptoms of PTSD [27]. A greater burden due to mental symptoms was observed in spouses and of young patients (age of a patient significantly affected the anxiety symptoms of their relatives) [7].

Our results show severe emotional and psychological burden on relatives over a period of 30 days following the patient’s ICU admission. Kentish-Barnes et al. (2009) and Fumis et al. (2015) have already pointed out that the burden on relatives should be routinely documented and, depending on the outcome, relatives should be informed about the support available to them [29], or that psychiatric support should always be offered to relatives [17].

**Limitations**

It was not possible to screen all relatives consistently in the ICU for logistic reasons. Therefore, only a limited number of study participants could be recruited with all inherent limitations for example selection bias due to pseudo-random approach. Further, patient data (e.g. severity of disease, length of stay) was not recorded in this pilot study. We therefore are unable to comment on a potential association with disease severity. Yet a study by Hwang et al. (2014) showed that it may make no difference whether patients spent two days or more than two days in the ICU. The prevalence of psychological stress in the relatives was the same for anxiety and depressive feelings [30].

**Conclusion**

The results of our study show that a majority of relatives of ICU patients had considerable psychological symptoms at ICU admission, with more than one third having clinically relevant symptoms a month later. Women had higher scores at baseline, but scores were comparable with those of men after 30 days. We noted that being present at the event that led to ICU admission, resulted in a significantly higher symptom burden. We believe that tools to record psychological stress and support services for relatives should be implemented into ICU care.

**Authors Contribution**

M. Hoffmannand K. Amreindesigned the study, M.-M. Jeitziner, J.C. Schefold, D. von Lewinski, N. Verheyen, P. Heindl, A. Bachlechner P. Ellerrecruited participants, R. Riedl, analyzed data, J.C. Schefold, D. von Lewinski, N. Verheyen, P. Heindl, A. Bachlechner P. Eller, R. Riedl, A.K. Holl, G. Sendlhofer, T.R. Pieber supported data interpretation, T.R. Pieber, G. Sendlhofer and K. Amreinsupervised the project, M. Hoffmann and M.-M. Jeitziner wrote the manuscript. All authors read and approved the final manuscript.

**Conflict of interest**

M.-M. Jeitziner and J.C. Schefold reports grants (full departmental disclosure) from Orion Pharma, Abbott Nutrition International, B. Braun Medical AG, CSEM AG, Edwards Lifesciences Services GmbH, Kenta Biotech Ltd, Maquet Critical Care AB, Omnicare Clinical Research AG, Nestle, Pierre Fabre Pharma AG, Pfizer, Bard Medica S.A., Abbott AG, Anandic Medical Systems, Pan Gas AG Healthcare, Bracco, Hamilton Medical AG, Fresenius Kabi, Getinge Group Maquet AG, Dräger AG, Teleflex Medical GmbH, Glaxo Smith Kline, Merck Sharp and Dohme AG, Eli Lilly and Company, Baxter, Astellas, Astra Zeneca, CSL Behring, Novartis, Covidien, Philips Medical, Phagenesis Ltd, Prolong Pharmaceuticals and Nycomed outside the submitted work. The money went into departmental funds. No personal financial gain applied.

All other authors declare that they have no competing interests.

**Compliance with ethical standard**

All authors declare their compliance with ethical standards.

**Funding**

Austrian Society of Internal Medicine and General Intensive Care Medicine and Emergency Medicine (ÖGIAIN).

**Acknowledgements**

We would like to thank all participating relatives and patients. We would also like to thank the nursing staff and the doctors in the intensive care units in Austria and Switzerland, as well as Professor W. Druml and Professor A. Valentin and the ÖGIAIN. This work was part of M. Hoffmann's doctoral thesis.

**References**

1. Al-Mutair AS, Plummer V, O’Brien A, Clerehan R (2013) Family needs and involvement in the intensive care unit: A literature review. J Clin Nurs 22:1805–17

2. Belayachi J, Himmich S, Madani N, Abidi K, Dendane T, Zeggwagh AA et al (2014) Psychological burden in inpatient relatives: The forgotten side of medical management. QJM 107:115–22

3. Day A, Haj-Bakri S, Lubchansky S, Mehta S (2013) Sleep, anxiety and fatigue in family members of patients admitted to the intensive care unit: a questionnaire study. Crit Care 17:R91

4. Komachi MH, Kamibeppu K (2016) Posttraumatic stress symptoms in families of cancer patients admitted to the intensive care unit: a longitudinal study. J Intensive Care 4:47

5. Pochard F, Azoulay E, Chevret S, Lemaire F, Hubert P, Canoui P et al (2001)Symptoms of anxiety and depression in family members of intensive care unit patients: ethical hypothesis regarding decision-making capacity. Crit Care Med 29:1893–7

6. Schmidt M, Azoulay E (2013) Sleepless nights in the ICU: The awaken family. Crit Care17:1–2

7. Köse I, Zincircioğlu Ç, Öztürk YK, Çakmak M, Güldoğan EA, Demir HF et al (2016) Factors Affecting Anxiety and Depression Symptoms in Relatives of Intensive Care Unit Patients. J Intensive Care Med 31:611-7

8. Fergé J-L, Le Terrier C, Banydeen R, Kentish-Barnes N, Derancourt C, Jehel L et al (2018) Prevalence of Anxiety and Depression Symptomatology in Adolescents Faced With the Hospitalization of a Loved One in the ICU. Crit Care Med 46:e330–3

9. Azoulay E, Pochard F, Kentish-Barnes N, Chevret S, Aboab J, Adrie C et al (2005) Risk of post-traumatic stress symptoms in family members of intensive care unit patients. Am J Respir Crit Care Med171:987–94

10. Schmidt M, Azoulay E (2012) Having a loved one in the ICU: The forgotten family. Curr Opin Crit Care 18:540–7

11. Rusinova K, Kukal J, Simek J, Cerny V (2014) Limited family members/staff communication in intensive care units in the Czech and Slovak Republics considerably increases anxiety in patients’ relatives--the DEPRESS study. BMC Psychiatry 14:21

12. Netzer G, Sullivan DR (2014) Recognizing, naming, and measuring a family intensive care unit syndrome. Ann Am Thorac Soc 11:435–41.

13. Petrinec AB, Daly BJ (2016) Post-Traumatic Stress Symptoms in Post-ICU Family Members: Review and Methodological Challenges. West J Nurs Res 38:57-78

14. Gries CJ, Engelberg RA, Kross EK, Zatzick D, Nielsen EL, Downey L et al (2010) Predictors of symptoms of posttraumatic stress and depression in family members after patient death in the ICU. Chest 137:280–7

15. Kross EK, Engelberg RA, Gries CJ, Nielsen EL, Zatzick D, Curtis JR (2011) ICU care associated with symptoms of depression and posttraumatic stress disorder among family members of patients who die in the ICU. Chest 139:795–801.

16. Pochard F, Darmon M, Fassier T, Bollaert PE, Cheval C, Coloigner M et al (2005) Symptoms of anxiety and depression in family members of intensive care unit patients before discharge or death. A prospective multicenter study. J Crit Care 20:90–6

17. Fumis RRL, Ranzani OT, Martins PS, Schettino G (2015) Emotional disorders in pairs of patients and their family members during and after ICU stay. PLoS One10:e0115332

18. Anderson WG, Arnold RM, Angus DC, Bryce CL (2008) Posttraumatic stress and complicated grief in family members of patients in the intensive care unit. J Gen Intern Med 23:1871–6

19. Lemiale V, Kentish-Barnes N, Chaize M, Aboab J, Adrie C, Annane D et al (2010) Health-Related Quality of Life in Family Members of Intensive Care Unit Patients. J Palliat Med13:1131–7

20. Desai S V., Law TJ, Needham DM (2011) Long-term complications of critical care. Crit Care Med39(2):371–9

21. Rawal G, Yadav S, Kumar R (2017) Post-intensive care syndrome: An overview. J Transl Intern Med 5:90-2

22. Lautrette A, Darmon M, Megarbane B, Joly LM, Chevret S, Adrie C et al (2007) A communication strategy and brochure for relatives of patients dying in the ICU. N Engl J Med 356:469–78

23. Horowitz M, Wilner N, Alvarez W (1979) Impact of event scale: A measure of subjective stress. Psychosom Med 41:209-18

24. Van Der Ploeg E, Mooren TTM, Van Der Velden PG, Kleber RJ, Brom D (2004) Construct Validation of the Dutch Version of the Impact of Event Scale. Psychol Assess 16:16–26

25. Sundin EC, Horowitz M (2002) Impact of Event Scale: psychometric properties. Br J Psychiatry 180:205–9

26. Jones C, Skirrow P, Griffiths RD, Humphris GH, Ingleby S, Eddleston J et al (2003) Rehabilitation after critical illness: A randomized, controlled trial. Crit Care Med 31:2456–61

27. Alfheim HB, Hofsø K, Småstuen MC, Tøien K, Rosseland LA, Rustøen T (2019)Post-traumatic stress symptoms in family caregivers of intensive care unit patients: A longitudinal study. Intensive Crit Care Nurs 50:5-10

28. Davidson JE, Aslakson RA, Long AC, Puntillo KA, Kross EK, Hart J et al (2017) Guidelines for Family-Centered Care in the Neonatal, Pediatric, and Adult ICU. Crit Care Med 45:103–28

29. Kentish-Barnes N, Lemiale V, Chaize M, Pochard F, Azoulay É (2009) Assessing burden in families of critical care patients. Crit Care Med 37:S448–56

30. Hwang DY, Yagoda D, Perrey HM, Currier PF, Tehan TM, Guanci M et al (2014) Anxiety and depression symptoms among families of adult intensive care unit survivors immediately following brief length of stay. J Crit Care 29:278–82
